# Supplementary material
Source: PubMed Central journal article supplement (PMC6198333)

## SUPPLEMENTARY DATA

**Supplementary Figure S1. The beneficial effects of acute GCGR agonism are Glucagon-specific.** Glucose Tolerance Test (GTT) (a) and area under the curve analysis (a-inset) in C57Bl/6J mice with or without 60 min native glucagon (10nmol/kg) pretreatment (n=6). 0.25U/kg Insulin Tolerance Test (ITT) and kg15 (b), 0.5U/kg ITT and kg30 (c), and plasma C-peptide (d) during 0.5U/kg ITT in C57Bl/6J mice with or without 60 min glucagon (10nmol/kg) pretreatment (n=14-16). ip (0.25 U/kg) after IUB288 (10nmol/kg) and insulin co-treatment (e). ITT (0.25 U/kg) (f) and blood glucose nadir (g) in lean, chow-fed mice pretreated with various doses of IUB288 (0, 0.3, 1, 3, and 10nmol/kg) for 180 min (n=7-9). All data are represented as mean +/- SEM. \* $p < 0.05$ , \*\* $p < 0.01$ , \*\*\* $p < 0.001$ .

SUPPLEMENTARY DATA

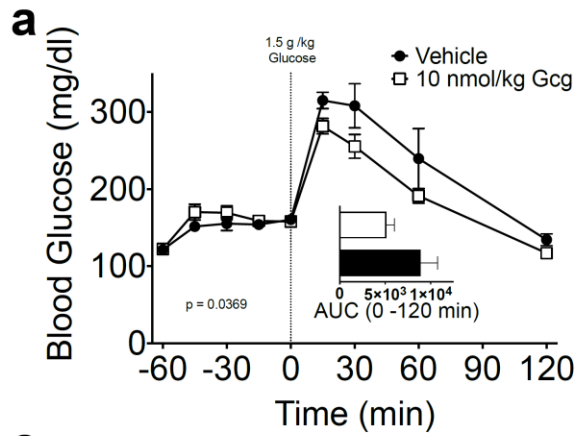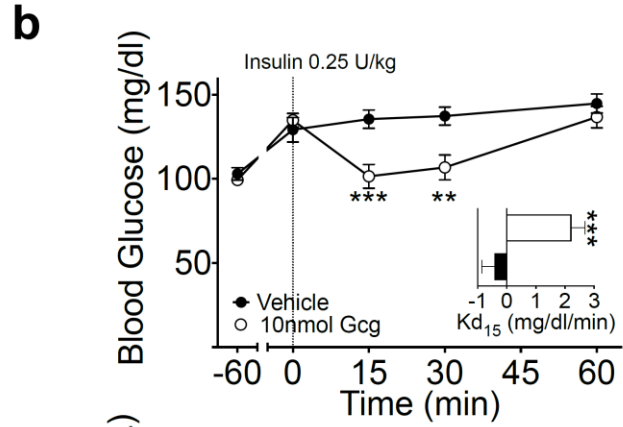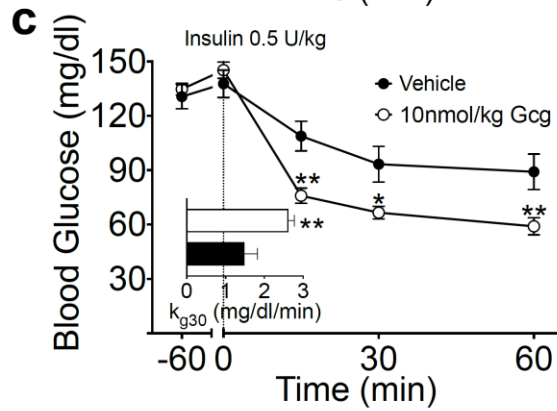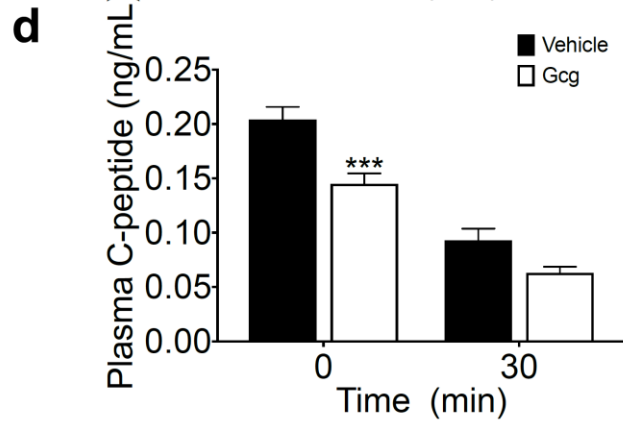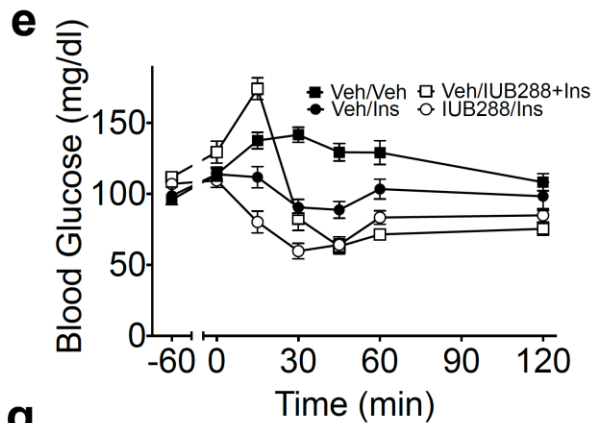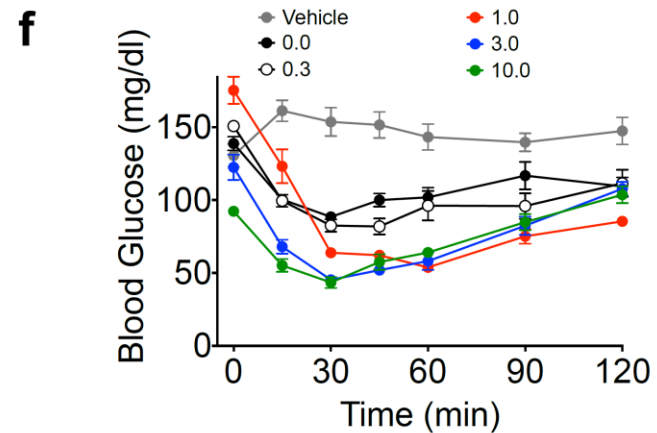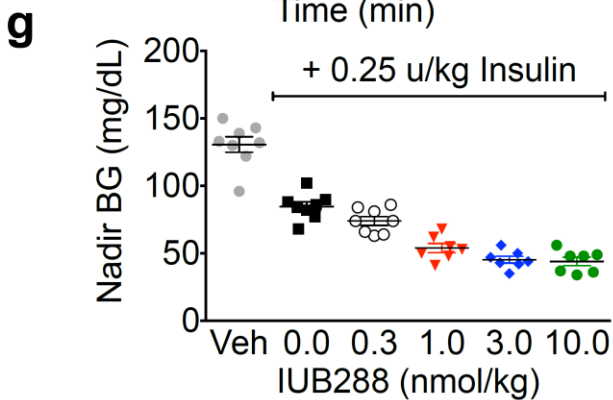

SUPPLEMENTARY DATA

**Supplementary Figure S2. Acute GcgR agonism enhances insulin action in obese mice.** Insulin Tolerance Test (ITT) at 0.25 (a), 0.50 (b), 0.75 (c), and 1.0 U/kg (d) insulin in DIO mice with single injection of IUB288 (10nmol/kg) at -60 min. All data are represented as mean  $\pm$  SEM. n=8 mice/group.

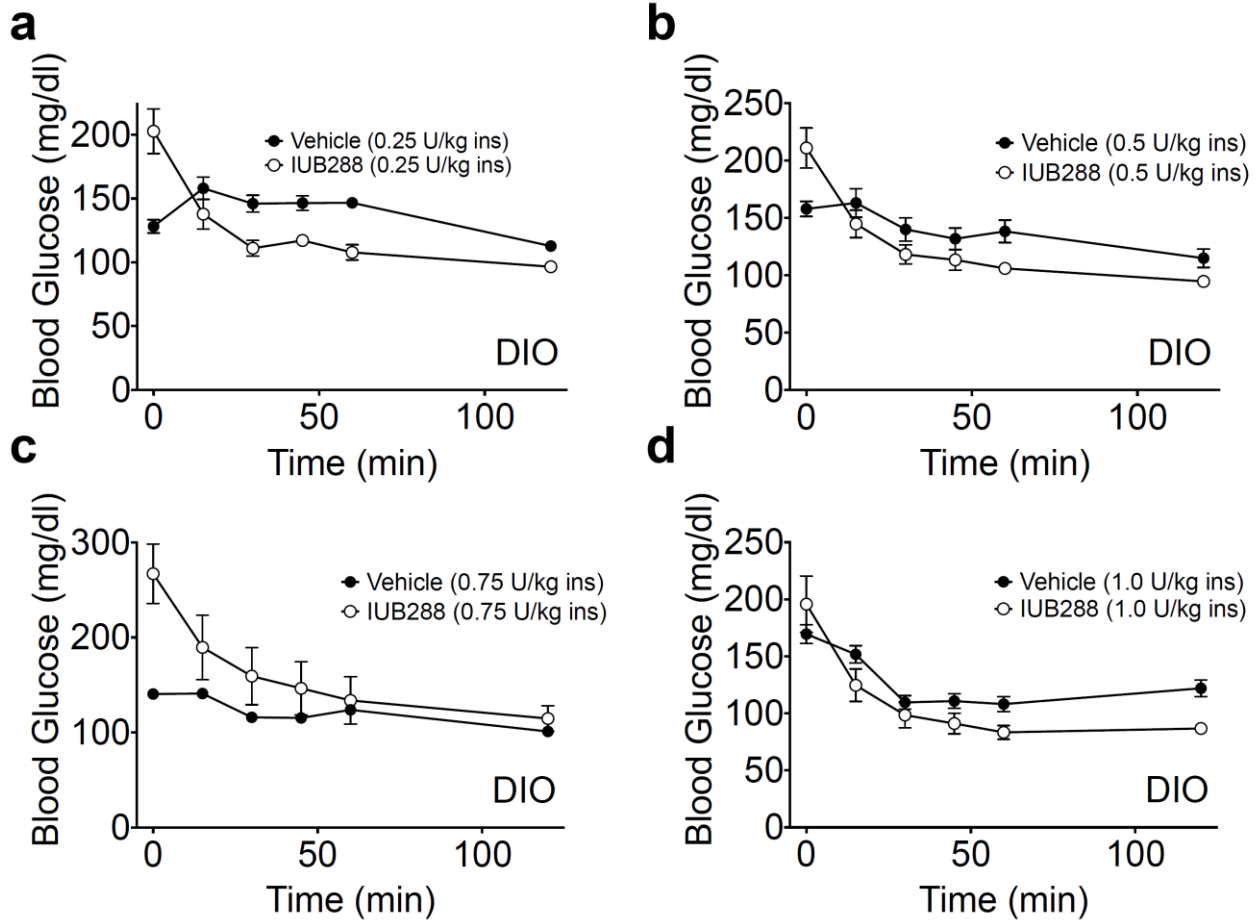

SUPPLEMENTARY DATA

**Supplementary Figure S3. The beneficial effects of acute GcgR agonism are GLP1R and FGF21 independent.** Insulin Tolerance Test (ITT) (0.25U/kg insulin) (a) and rate of glucose change (kg30, b) of Control and GLP1-R deficient mice with or without 60 min ip IUB288 (10nmol/kg) pretreatment. ITT (0.25U/kg insulin) (c) and rate of glucose change (kg15, d) of Control and *Fgf21*<sup>ΔLiver</sup> mice with or without ip 60 min IUB288 (10nmol/kg) pretreatment. All data are represented as mean +/- SEM. \*p< 0.05, \*\*p< 0.01, \*\*\*p< 0.001 vs Control vehicle within time points, #p< 0.05 vs *Fgf21*<sup>ΔLiver</sup> vehicle within time points.

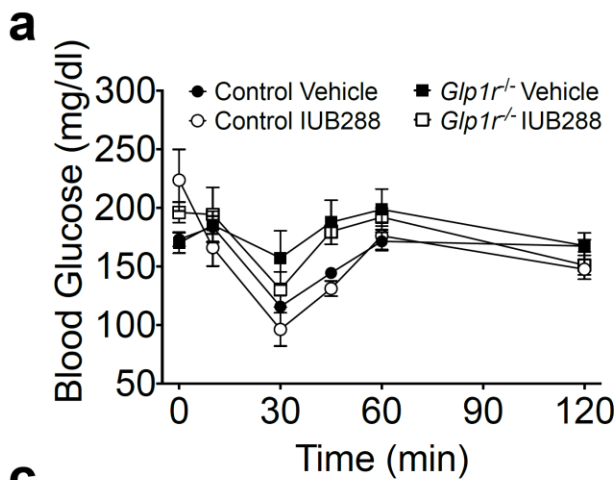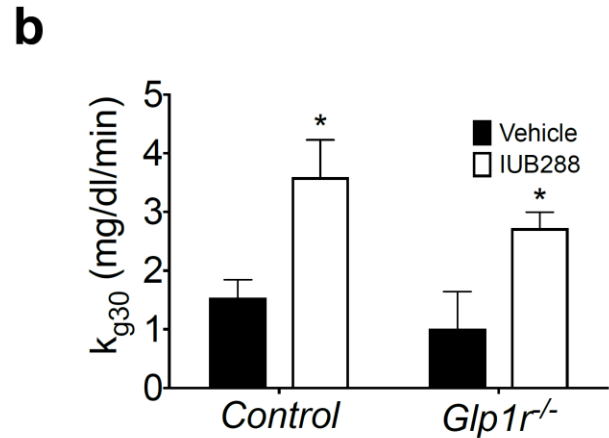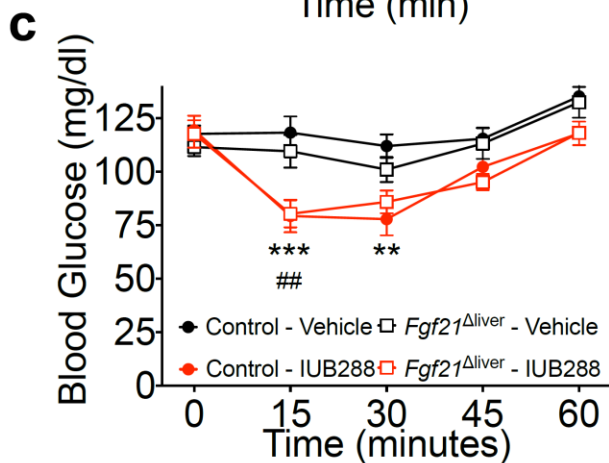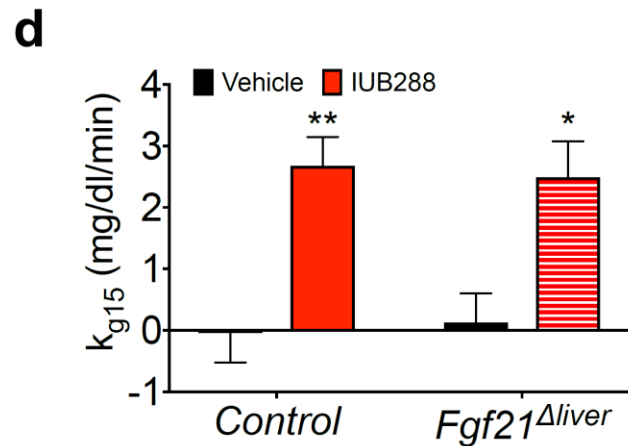

SUPPLEMENTARY DATA

**Supplementary Figure S4. The beneficial effects of acute GcgR agonism are independent of glycogen depletion.** Blood glucose excursion (a) and 15min change (b) in response to GcgR agonsim (10nmol/kg IUB288) in the presence or absence of glycogen phosphorylase a/b inhibitor (10mg/kg BAY R3401) in C57Bl/6J mice. GTT (2g/kg) (c) and area under the curve analysis (d) following ip glucose challenge IUB288- and BAY R3401-treated and control mice (n=6). All data are represented as mean +/- SEM, \*\*p< 0.01, \*\*\*p< 0.001.

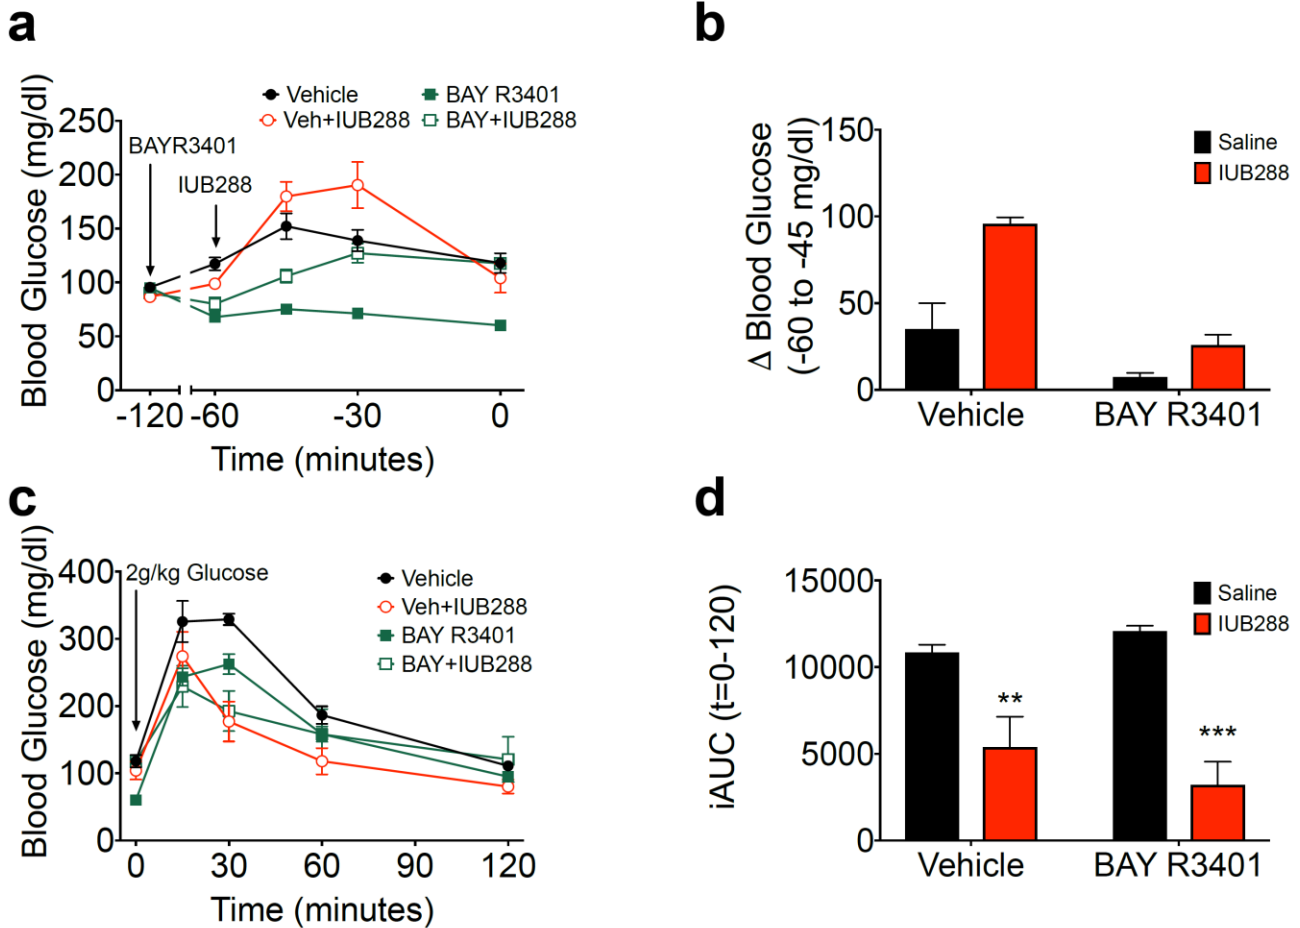

SUPPLEMENTARY DATA

**Supplementary Figure S5. GcgR agonism enhances insulin action at GSK3.** Immunoblot analysis of hepatocyte insulin signaling in response to low- (a) and high- (b) dose insulin and glucagon co-treatment. Representative images of 6 independent/observations. Immunoblot analysis of GSK3 $\alpha/\beta$  phosphorylation (c & d) in response to insulin and glucagon co-treatment in isolated hepatocytes (see Figure 3d). All data are represented as mean  $\pm$  SEM of 4 independent/observations. \* $p < 0.05$ , \*\* $p < 0.01$ , \*\*\* $p < 0.001$ .

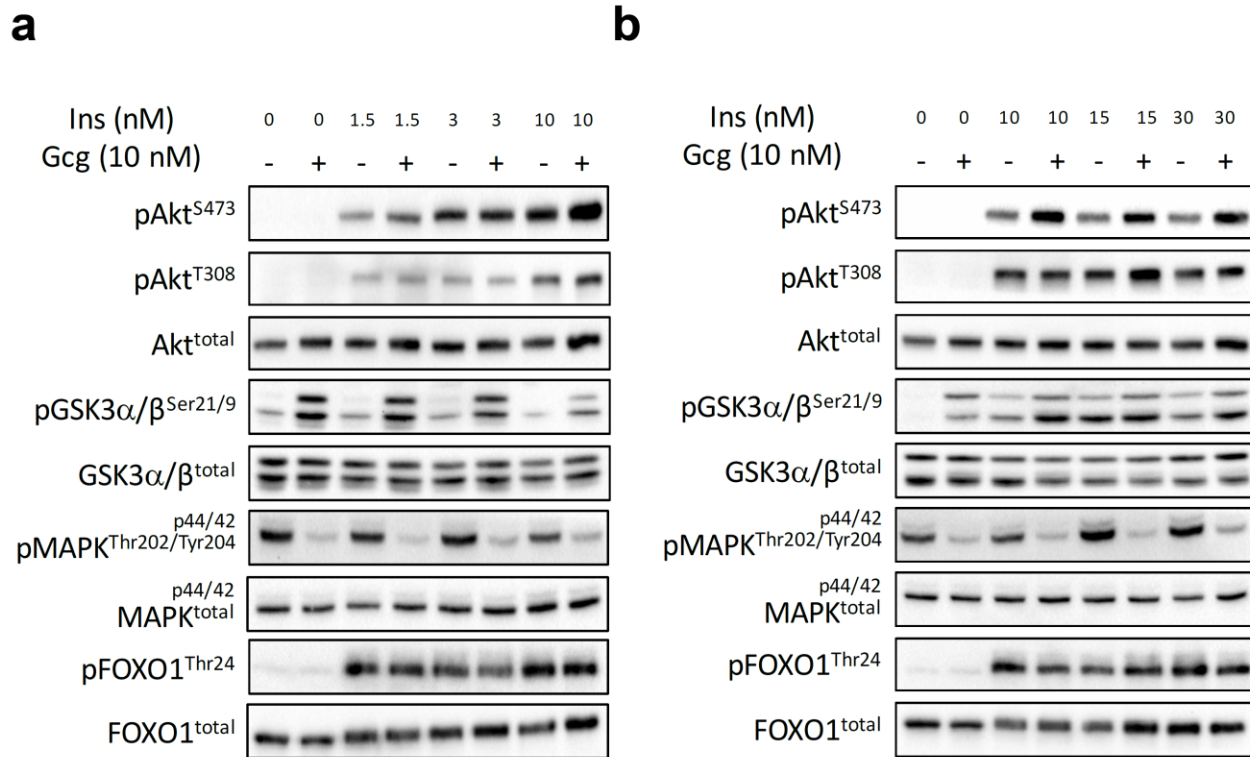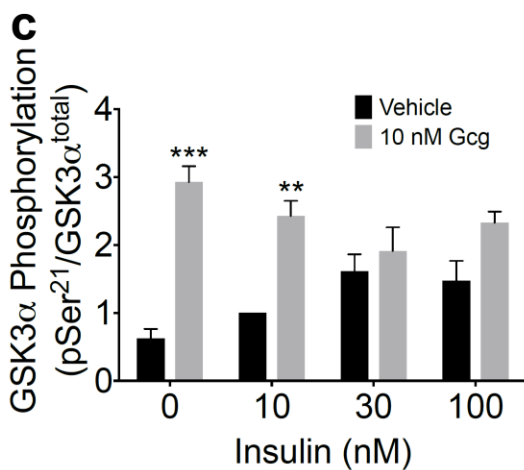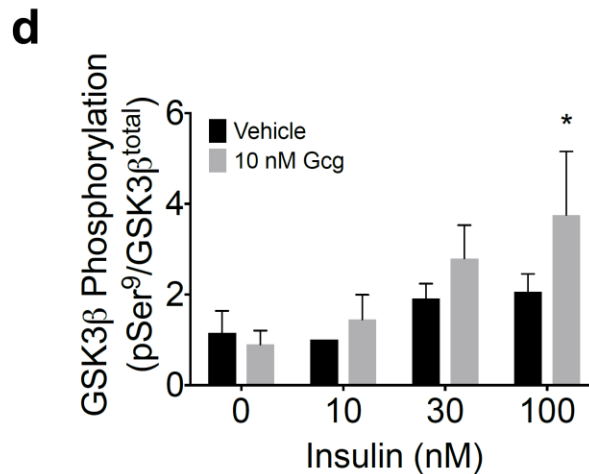

**Supplementary Figure S6. Insulin signaling during labeled, euglycemic clamp.** Immunoblot analysis in liver, EDL, and BAT from clamped mice (Figures 3-4). Densitometric quantification (a-d) and representative images (e-g) of insulin signaling pathway components in 6-7 mice/group. \* $p < 0.05$ , \*\* $p < 0.01$ .

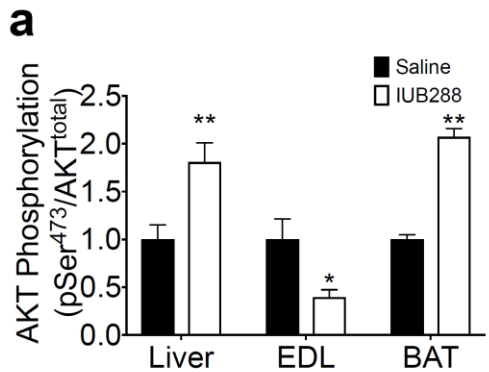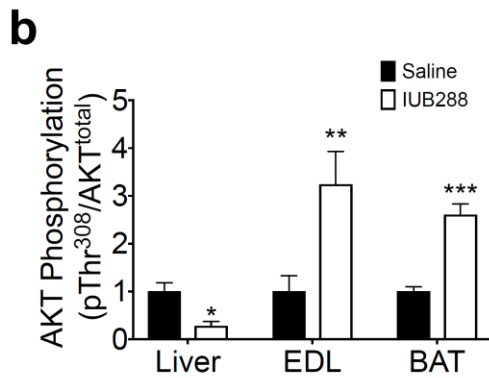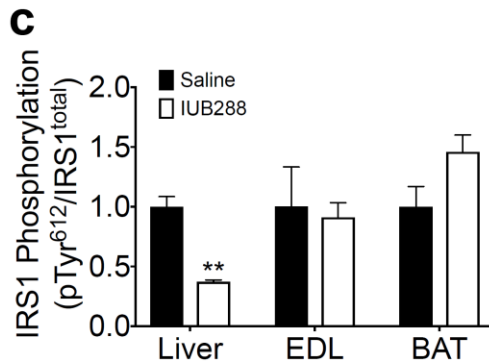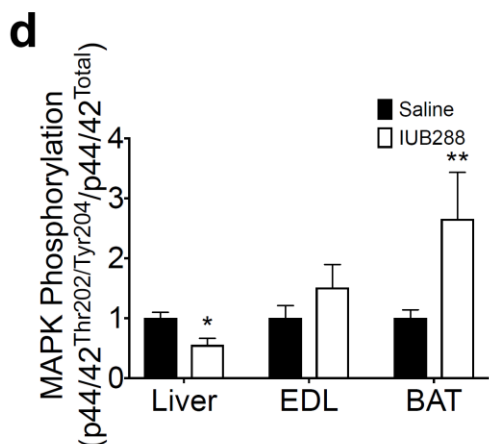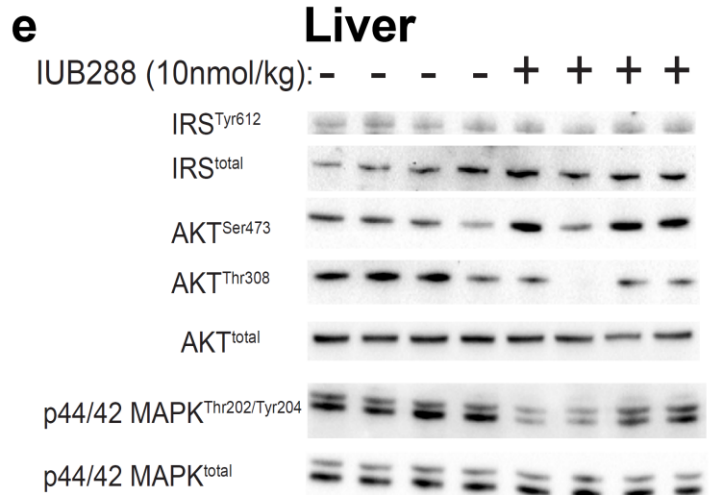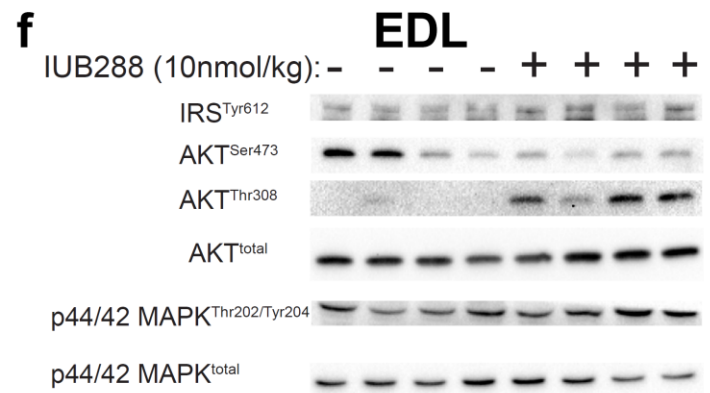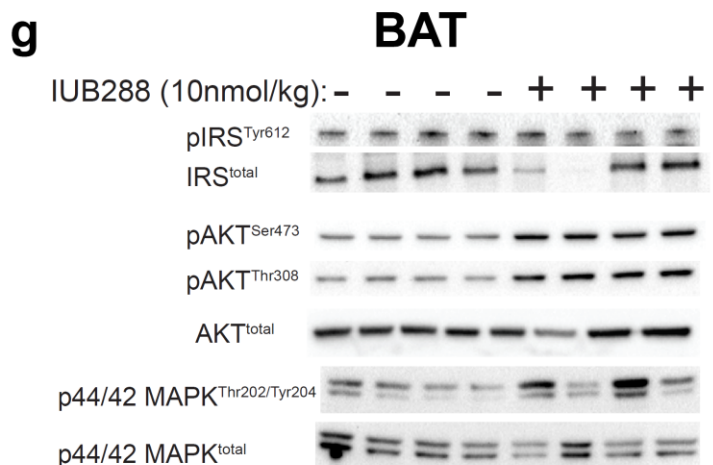

Supplement: DB180068SupplementaryData.pdf [file DB180068SupplementaryData.pdf]
